# Supplementary material for: 3 fraction pencil-beam scanning proton accelerated partial breast irradiation: early provider and patient reported outcomes of a novel regimen
Source: Springer Nature journal article supplement (doi:10.1186/s13014-019-1417-7), 2019-11-21

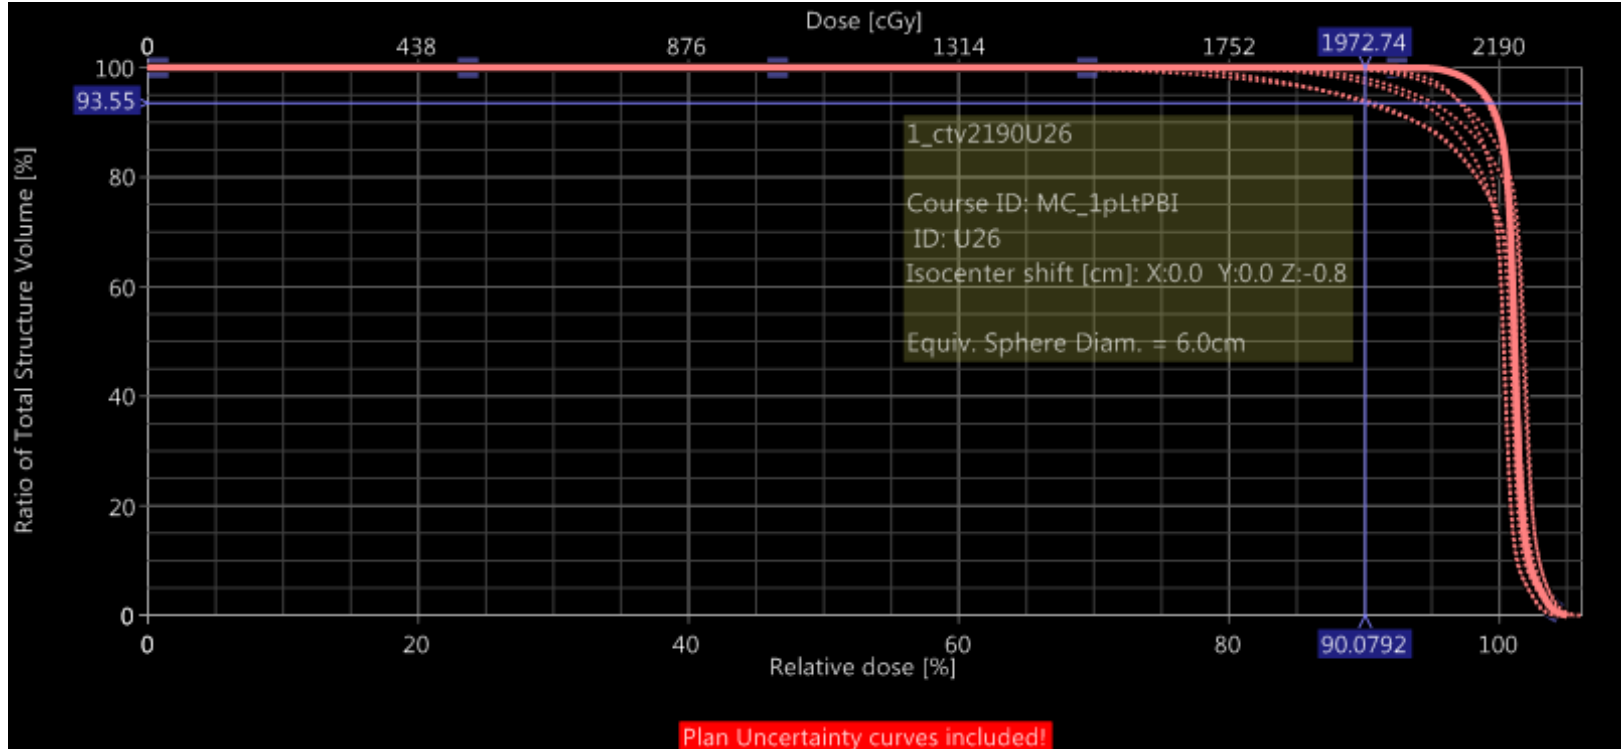

Plan Uncertainty curves included!

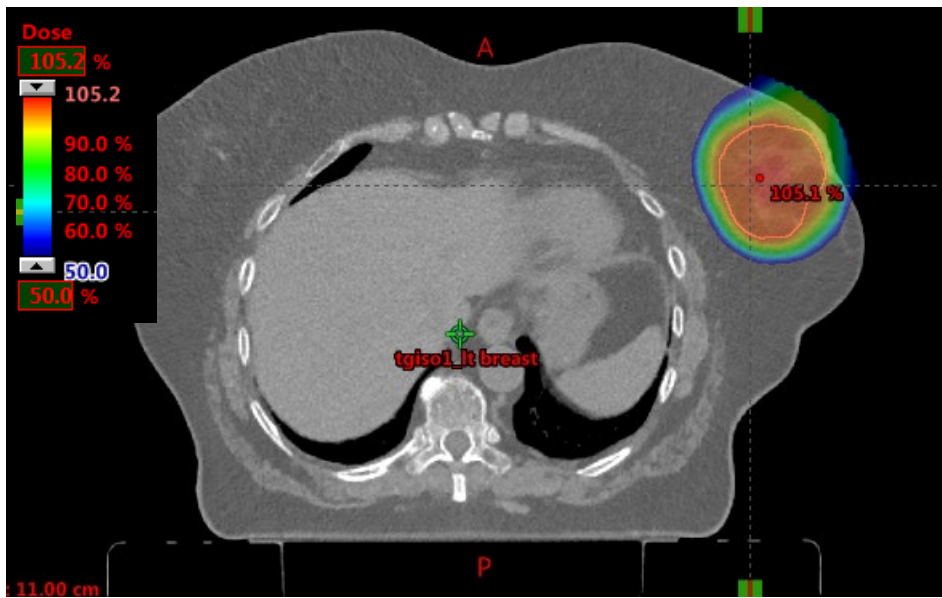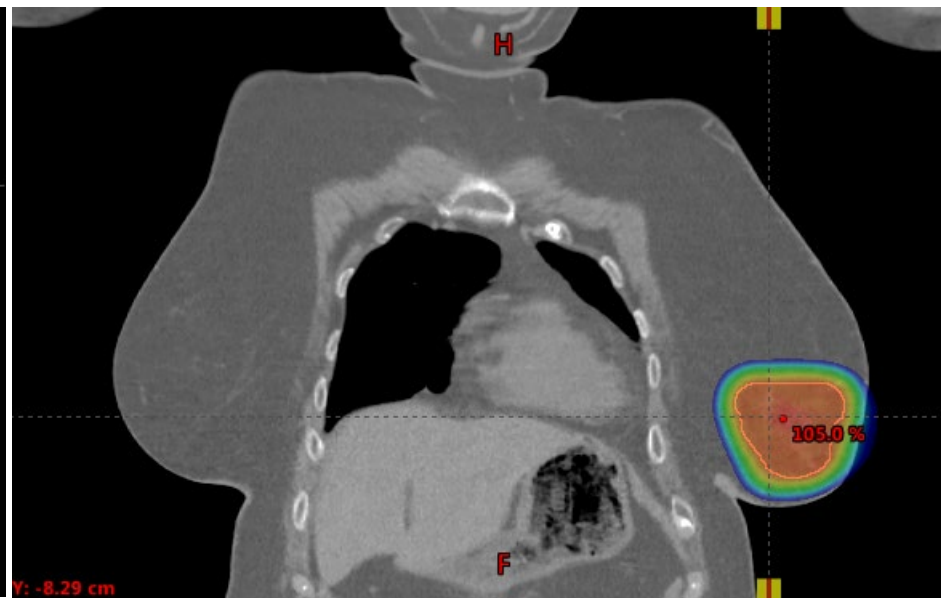

Supplement: MOESM1 [file 17415924]
